# Supplementary material for: Domain formation on curved membranes: phase separation or Turing patterns?
Source: Royal Society of Chemistry journal article supplement (doi:10.1039/c3sm50650a), 2013-01-01
Supplement: c3sm50650a.pdf [file c3sm50650a.pdf]

Electronic Supplementary Information (ESI) for:  
**Domain formation on curved membranes: phase separation or Turing patterns?**  
E. Orlandini, D. Marenduzzo\* and A. B. Goryachev

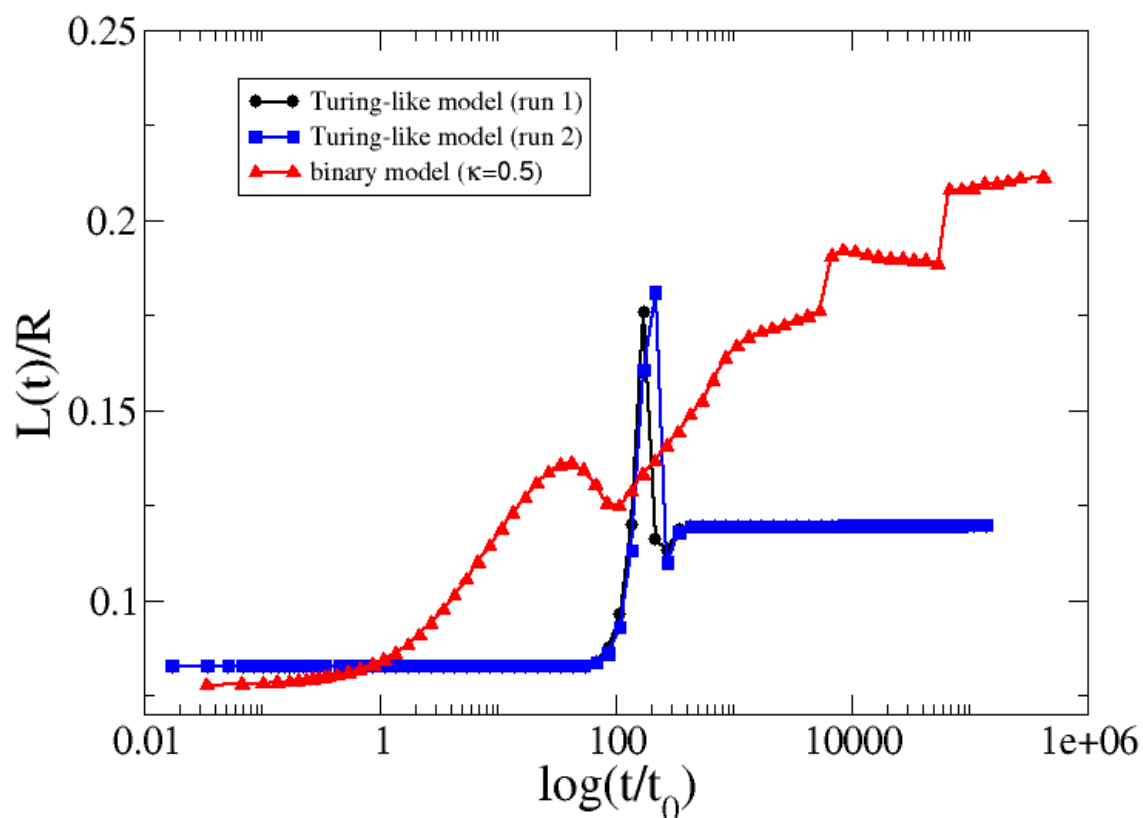

**Suppl. Fig. 1** This plot shows the time evolution of the square root of the inverse second moment of the structure factor (which defines a length scale  $L(t)$ , here scaled by the radius of curvature  $R$  of the sphere on which the pattern formation is studied). The three curves correspond to two runs with the Turing-like model (different random seed to initialize them) and to the binary fluid model (see legends).

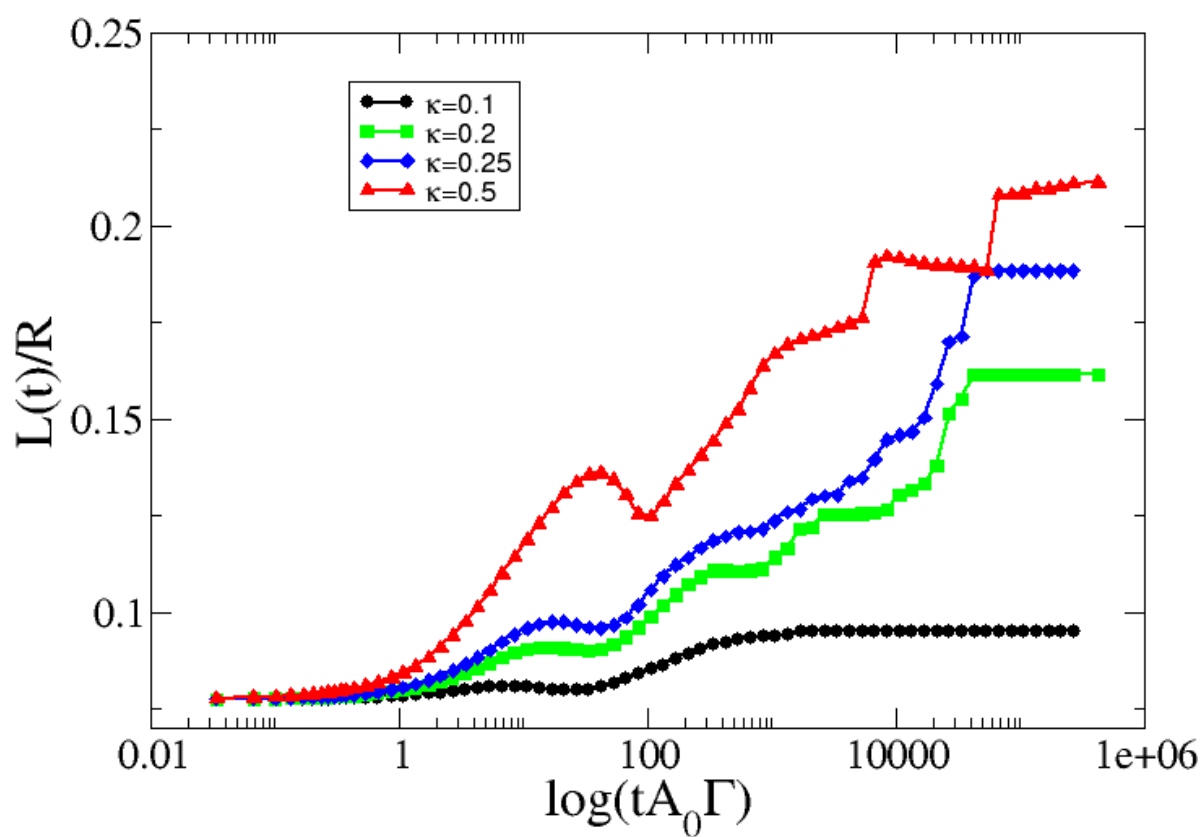

**Suppl. Fig. 2** As in Suppl. Fig. 1, but for the binary model, and different values of  $\kappa$  (see legend for the values corresponding to each curve).

**Suppl. Movie 1** This movie shows the dynamics corresponding to Fig. 2 in the main text, for the Turing-like model (the colour scale is now linear unlike in Fig. 2).

**Suppl. Movie 2** This movie shows the dynamics corresponding to Fig. 2 in the main text, for the binary model.

**Suppl. Movie 3** This movie shows the dynamics corresponding to Fig. 5 in the main text, for the Turing-like model.

**Suppl. Movie 4** This movie shows the dynamics corresponding to Fig. 5 in the main text, for the binary model.
